# Supplementary material for: Artificial Intelligence for Early Detection of Chest Nodules in X-ray Images
Source: MDPI journal article supplement (doi:10.3390/biomedicines10112839), 2022-11-07
Supplement: s1 [file s1]

**Table S1.** Relationship between nodule size and the probability of early detection.

|                                                    | <b>Not early<br/>detected</b> | <b>Early detected by<br/>AI only</b> | <b>Early detected by<br/>radiologists only</b> | <b>Early detected by<br/>both AI and<br/>radiologists</b> |
|----------------------------------------------------|-------------------------------|--------------------------------------|------------------------------------------------|-----------------------------------------------------------|
| Nodule<br>size,<br>N(% of<br>same size<br>nodules) |                               |                                      |                                                |                                                           |
| 6-10mm                                             | 4 (25)                        | 4 (25)                               | 7 (43.7)                                       | 1 (7.3)                                                   |
| 10-20mm                                            | 44 (29.5)                     | 33 (22.1)                            | 29 (19.5)                                      | 43 (28.9)                                                 |
| 20-30mm                                            | 24 (20.8)                     | 26 (22.6)                            | 21 (18.3)                                      | 44 (38.3)                                                 |
| >30mm                                              | 17 (16.5)                     | 28 (27.2)                            | 11 (10.7)                                      | 47 (45.6)                                                 |
| Total, N(%)                                        | 89 (23.2)                     | 91 (23.8)                            | 68 (17.8)                                      | 135 (35.2)                                                |

The probability of early detection increased while the nodule size increased. The AI model (ensemble model) performed better than radiologists in nodules >10 mm. The radiologists performed better in nodules <10 mm.

**Table S2.** Relationship between nodule size and the misclassification.

|                                              | Misclassified by<br>AI | Misclassified by<br>radiologist | Nodules for<br>classification, N |
|----------------------------------------------|------------------------|---------------------------------|----------------------------------|
| Nodule size,<br>N(% of same size<br>nodules) |                        |                                 |                                  |
| 6-10mm                                       | 11 (68.8)              | 8 (50)                          | 16                               |
| 10-20mm                                      | 73 (49.0)              | 77 (51.7)                       | 149                              |
| 20-30mm                                      | 45 (39.1)              | 50 (43.5)                       | 115                              |
| >30mm                                        | 28 (27.2)              | 45 (43.7)                       | 103                              |
| Total, N(%)                                  | 157 (41.0)             | 180 (47.0)                      | 383                              |

Both the AI model (ensemble model) and the radiologists performed better when nodule size increased.
